# Supplementary material for: Wet-milled transition metal oxide nanoparticles as buffer layers for bulk heterojunction solar cells
Source: Royal Society of Chemistry journal article supplement (doi:10.1039/c2ra20543b), 2012-01-01
Supplement: c2ra20543b.pdf [file c2ra20543b.pdf]

## Supporting Information

### Wet-Milled Transition Metal Oxide Nanoparticles as Buffer Layers for Bulk Heterojunction Solar Cells

Jen-Hsien Huang,<sup>1</sup> Tzu-Yen Huang,<sup>2</sup> Hung-Yu Wei,<sup>3</sup> Kuo-Chuan Ho<sup>2,3</sup> and  
Chih-Wei Chu<sup>1,4\*</sup>

<sup>1</sup> Research Center for Applied Sciences, Academia Sinica, Taipei 11529, Taiwan

<sup>2</sup> Department of Chemical Engineering, National Taiwan University, Taipei 10617,  
Taiwan

<sup>3</sup>Institute of Polymer Science and Engineering, National Taiwan University, Taipei,  
Taiwan 106

<sup>4</sup>Department of Photonics National Chiao Tung University, Hsinchu, Taiwan 300

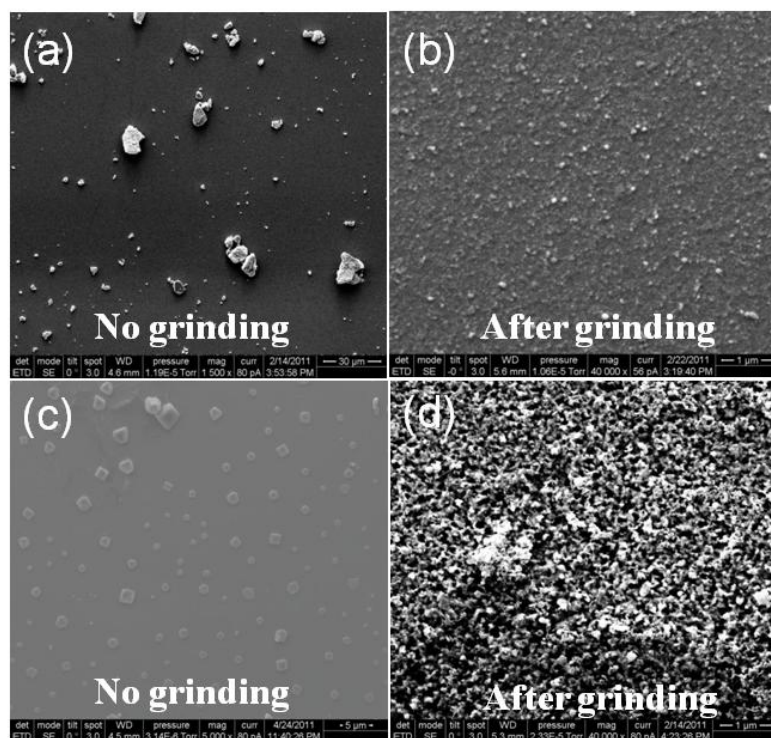

Figure S1. The comparison of SEM images for (a) raw  $V_2O_5$ ; (c) raw  $WO_3$  and (b)  $V_2O_5$ ; (d)  $WO_3$  after grinding. It can be found that the particle size of the  $V_2O_5$  and  $WO_3$  decreases significantly after grinding for 240 min.

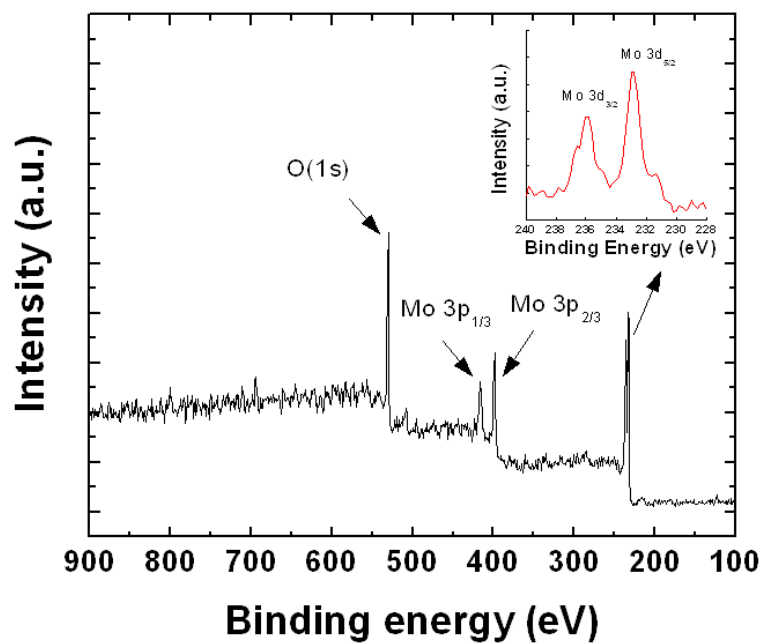

Figure S2. The XPS spectrum of the MoO<sub>3</sub> film cast from the as-prepared solution. Based on the survey spectrum, it can be found that the chemical composition is totally contributed from the MoO<sub>3</sub> powder without any impurity. This indicates that this solution-based method preserves the intrinsic electronic properties of MoO<sub>3</sub>.

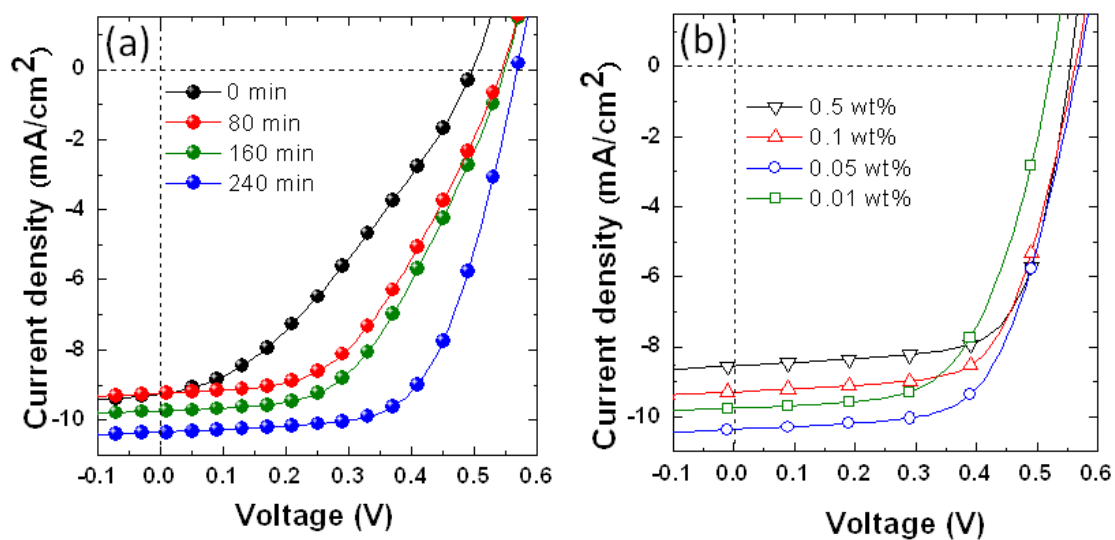

Figure S3. (a) The effect of grinding time on cell performance (P3HT:PCBM) with MoO<sub>3</sub> as buffer layers; (b) the effect of MoO<sub>3</sub> solution concentration on the cell performance.
